# Supplementary material
Source: PubMed Central journal article supplement (PMC3457521)
Supplement: MCB.00429-12_zmb999109668so1.pdf [file MCB.00429-12_zmb999109668so1.pdf]

## **Supplemental material**

# **Activating Transcription Factor 3 Regulates Immune and Metabolic Homeostasis**

Jan Rynes, Colin D. Donohoe, Peter Frommolt, Susanne Brodesser, Marek Jindra  
and Mirka Uhlirova

## SUPPLEMENTAL FIGURES

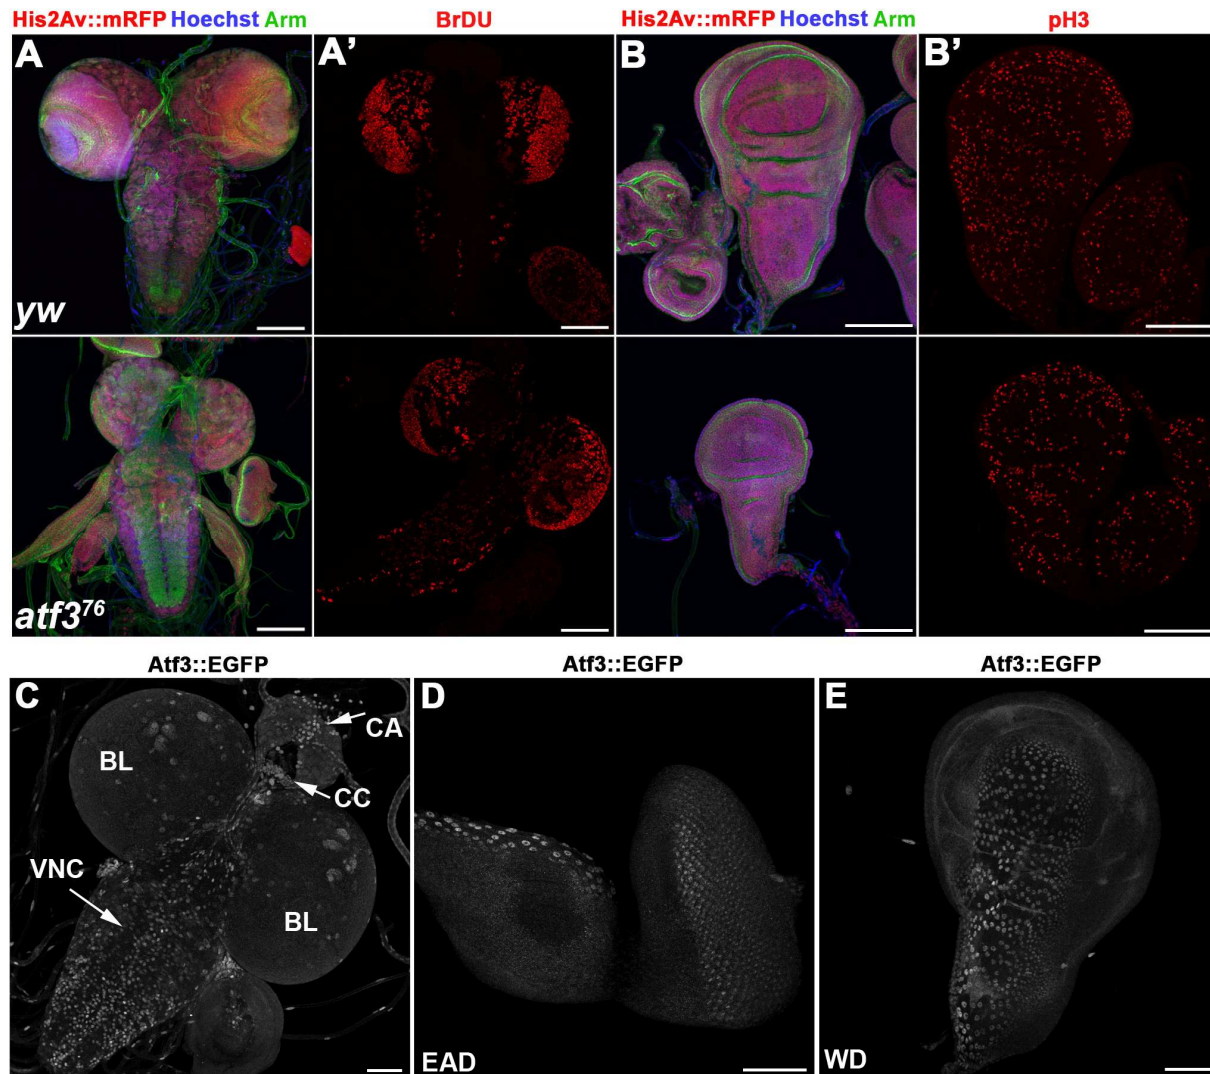

**FIG S1** Absence of *atf3* does not affect cell proliferation. Confocal projections of the brain (A) and a wing disc (B) dissected from third-instar *atf3<sup>76</sup>/Y* and *yw/Y* control larvae. Cell outlines are visualized with anti-Arm antibody (green); Hoechst (blue) and a transgenic Histone2Av::mRFP fusion protein (red) were used for staining of nuclei. Cell proliferation is visualized by BrdU incorporation (A') and anti-pH3 staining (B'), respectively. Scale bars are 100 μm. (C-E) Spatial pattern of Atf3 expression. Anti-GFP antibody detects nuclear Atf3::EGFP in confocal micrographs of the brain and ring gland (C), eye/antennal imaginal disc (D) and the peripodial epithelium of the wing disc (E) of third-instar *atf3<sup>[gBAC]</sup>/+* larvae. VNC, ventral nerve cord; BL, brain lobes; CA, corpora allata; CC, corpora cardiaca; EAD, eye/antennal imaginal disc; WG, wing disc. Scale bars are 50 μm.

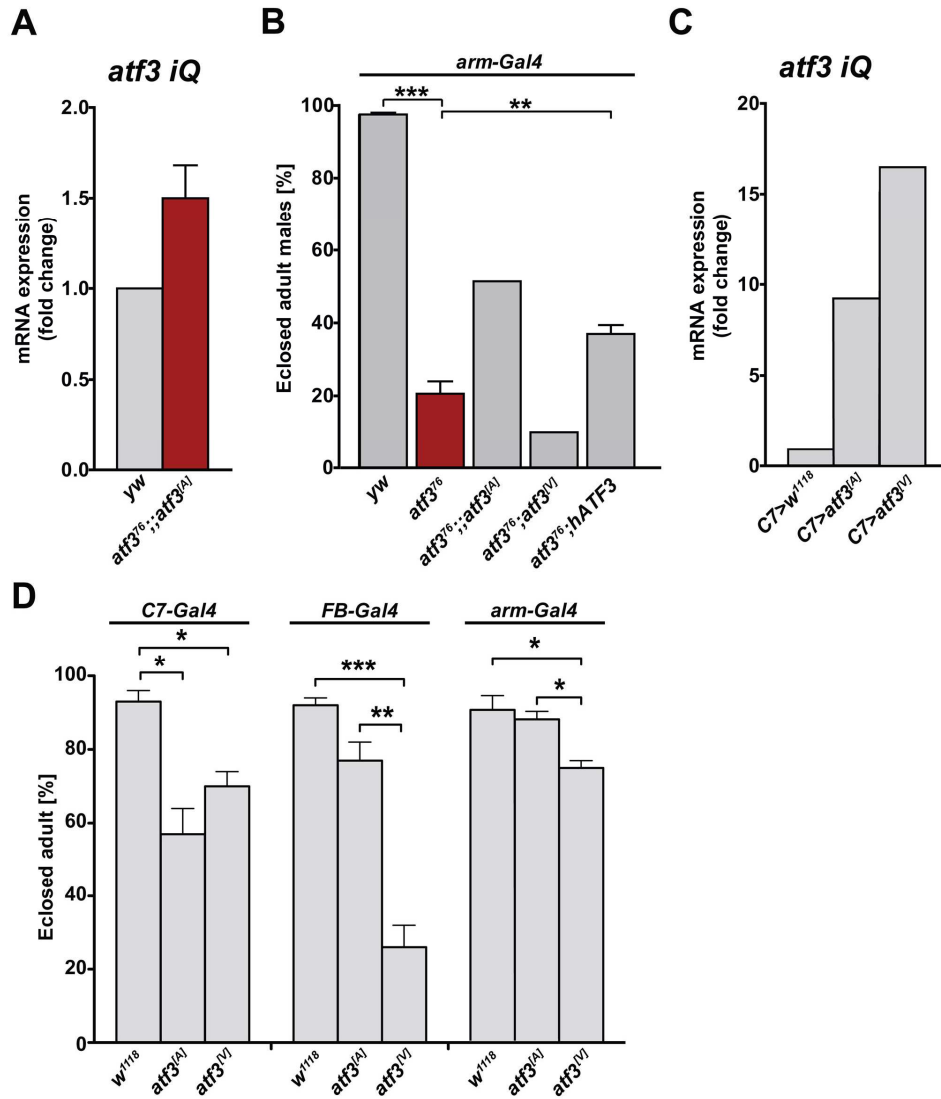

**FIG S2** Manipulation of *atf3* expression and its effect on survival of *atf3<sup>76</sup>* mutants. (A) A single copy of an *UAS-atf3<sup>AI</sup>* (without a *Gal4* driver) transgenic construct in *atf3<sup>76</sup>* mutant larvae restored expression of *atf3* mRNA to 1.5-fold the level in control *yw/Y* larvae. (B) Ubiquitous expression of either *Drosophila* (*UAS-atf3<sup>AI</sup>*) or human (*UAS-hATF3*) genes using the *arm-Gal4* driver improved survival of *atf3* mutants while strong *atf3* overexpression (*UAS-atf3<sup>VI</sup>*) aggravated larval lethality. (C) Comparison of *atf3* mRNA levels in *C7>w<sup>1118</sup>* (control), *C7>UAS-atf3<sup>AI</sup>* and *C7>UAS-atf3<sup>VI</sup>* third-instar larvae. In (A-C), total RNA was isolated from third-instar larvae of indicated genotypes was subjected to qRT-PCR ( $n = 4$ ). (D) Expression of *UAS-atf3<sup>AI</sup>* or *UAS-atf3<sup>VI</sup>* transgenes in wild-type *Drosophila* larvae using the *FB-* or *C7-Gal4* (fat body and midgut) or *Arm-Gal4* (ubiquitous) drivers reduces survival. All data are mean  $\pm$  SEM; \* $p < 0.05$ , \*\* $p < 0.01$ , and \*\*\* $p < 0.001$ .

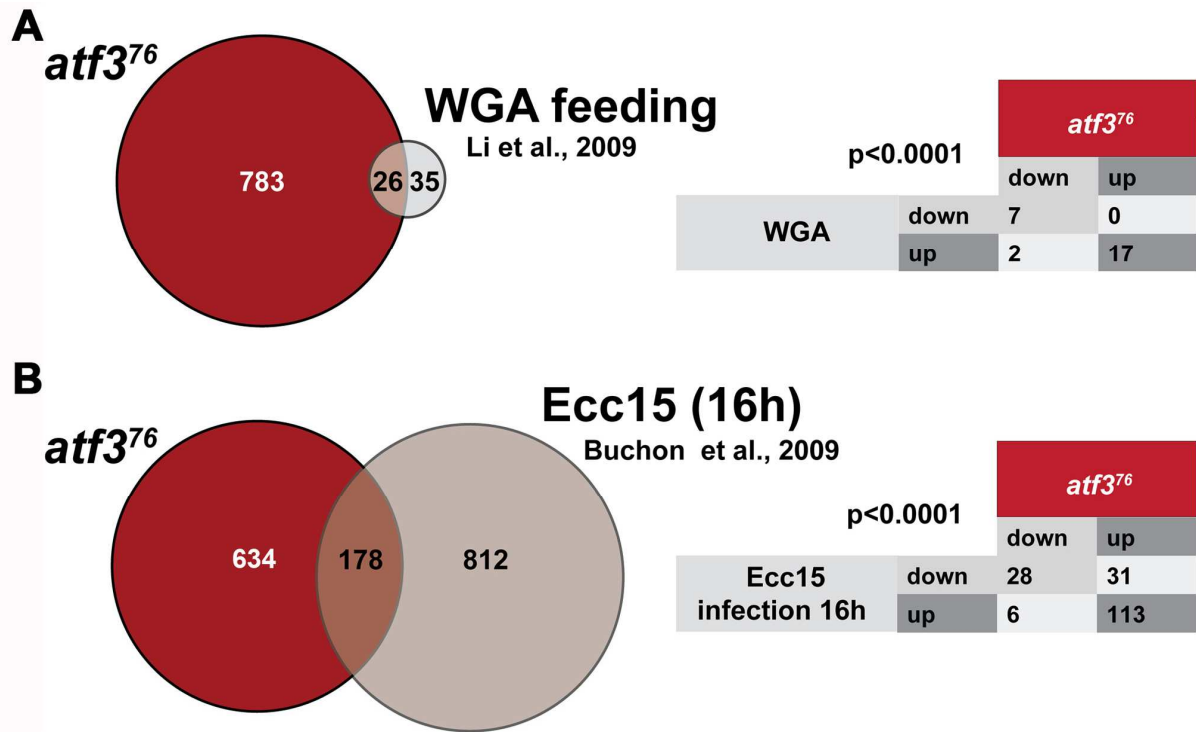

**FIG S3** Transcriptional program altered by *atf3* deficiency resembles gut damage and infection. (A and B) Venn diagrams show overlap of regulated genes identified by mRNA sequencing analysis in *atf3*<sup>76</sup> mutant larvae (this study) and microarray data generated by hybridizing RNA from guts of larvae fed with WGA (Li et al., 2009) (A) or from guts of adult flies fed with phytopathogenic bacteria *Erwinia carotovora* (*Ecc15*) (Buchon et al., 2009) (B). Contingency tables provide information about directionality of the expression of shared transcripts between the two data sets and serve to calculate the significance of overlap using a one-tailed Fisher Exact Probability test.

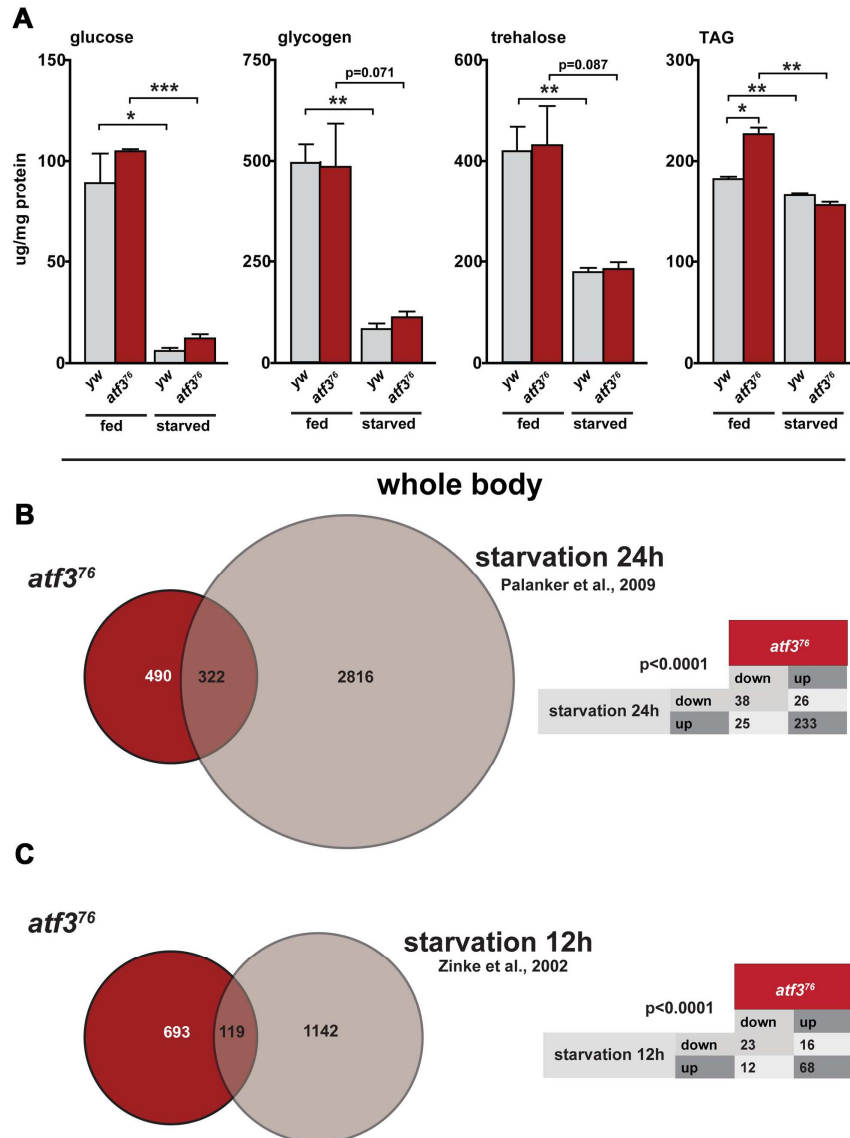

**FIG S4** Metabolic and transcriptional profiles in *atf3* mutant larvae. (A) When larvae were fed ad libitum, total contents of glucose, glycogen and trehalose remained unaffected by *atf3* deficiency while TAG levels were elevated relative to control larvae. 16 h of wet starvation led to depletion of carbohydrate and TAG reserves in both genotypes. Data are mean  $\pm$  SEM;  $n = 4$ ; \* $p < 0.05$ , \*\* $p < 0.01$ , and \*\*\* $p < 0.001$ . (B and C) Venn diagrams indicate overlap of differentially regulated genes identified by mRNA sequencing analysis in *atf3<sup>76</sup>* mutant larvae (this study) and microarray data generated from third-instar larvae starved for 24 h and 12 h, respectively, as reported by Palanker et al., 2009 (B) and Zinke et al., 2002 (C). Contingency tables provide information about directionality of expression of shared transcripts between the two data sets and serve to calculate the significance of overlap using a one-tailed Fisher Exact Probability test.

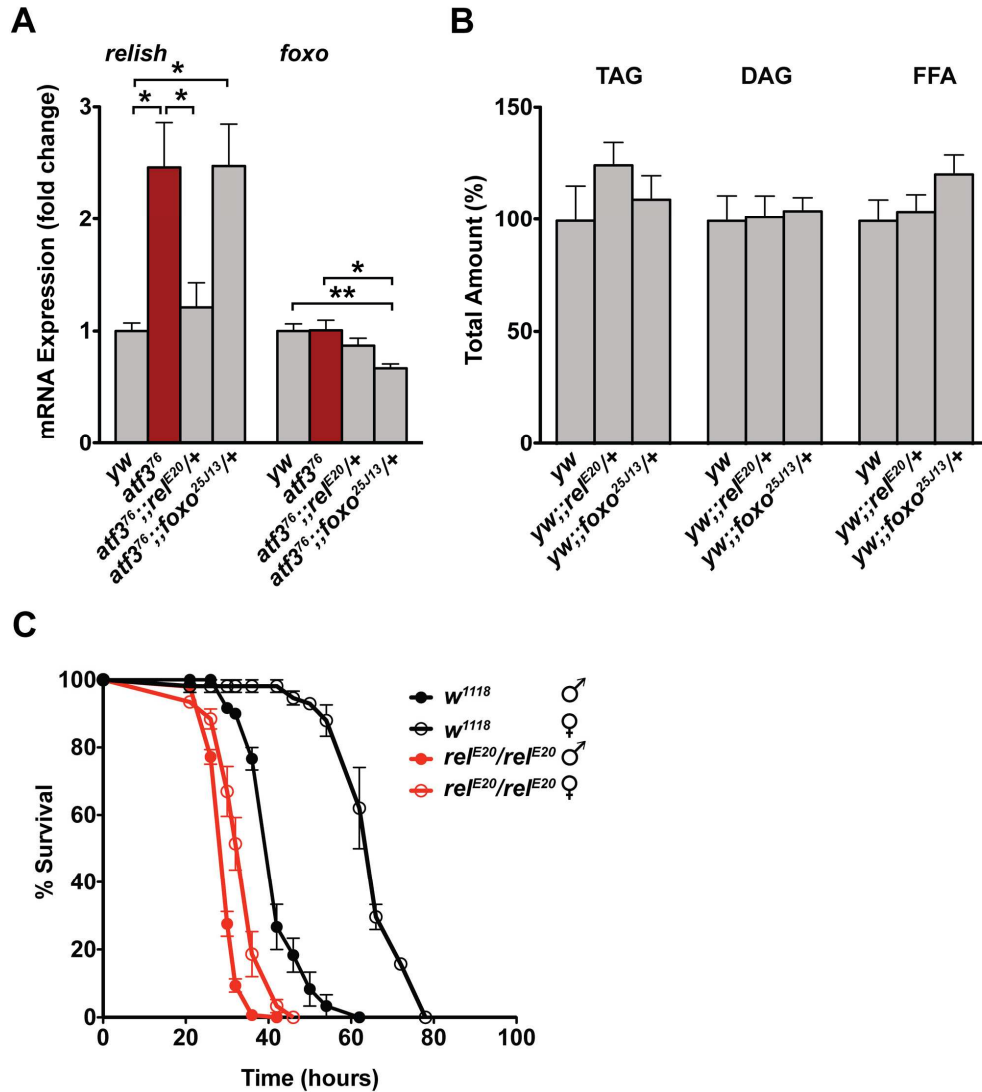

**FIG S5** Effect of *atf3*, *rel* and *foxo* mutations on *rel* and *foxo* mRNA expression and of *rel* and *foxo* mutations on lipid content and adult tolerance to starvation. (A) *relish* but not *foxo* mRNA is up-regulated in *atf3* mutant larvae (red columns). Introduction of a single loss of function allele of (*rel*<sup>E20</sup> or *foxo*<sup>25J13</sup>) into the *atf3*<sup>76</sup> mutant background reduces their expression of the corresponding mRNAs as determined by qRT-PCR. (B) Total contents of triacylglycerols (TAG), diacylglycerols (DAG) and free fatty acids (FFA) as determined by thin layer chromatography remain unchanged in *rel* and *foxo* heterozygotes compared to control larvae. Data are mean  $\pm$  SEM;  $n \geq 4$ ; \* $p < 0.05$ , \*\* $p < 0.01$ , and \*\*\* $p < 0.001$ . (C) Adult *rel*<sup>E20</sup> homozygotes are sensitive to starvation. Data are plotted as per cent of average survival rate values  $\pm$  SEM. Data show a representative experiment out of three independent trials.

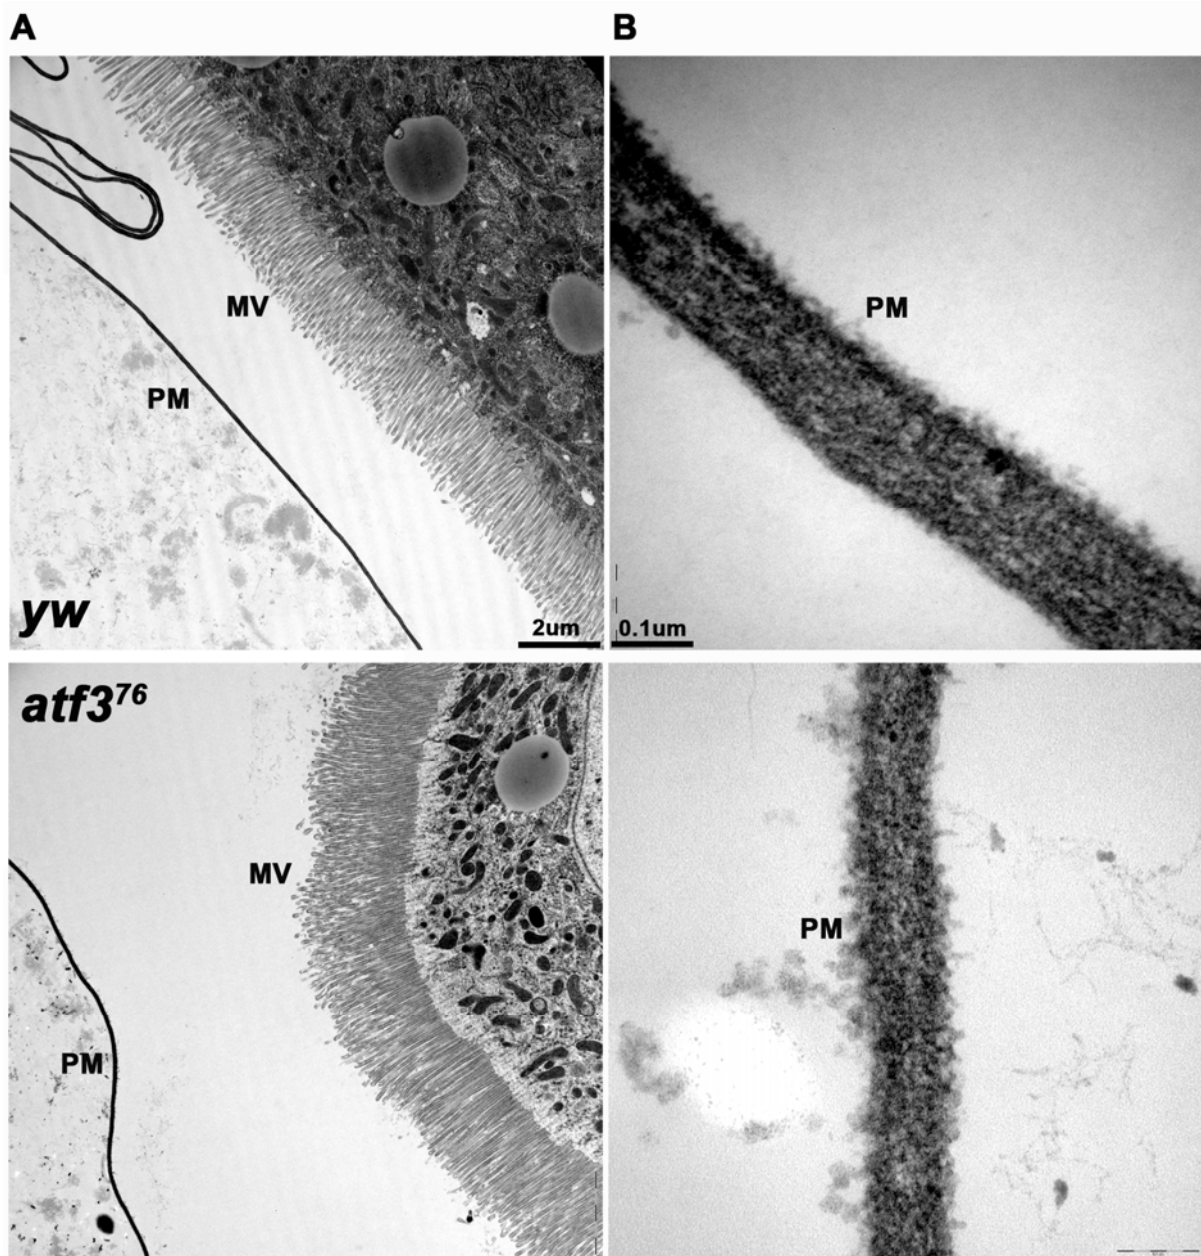

**FIG S6** Ultrastructure of the larval enterocytes and the peritrophic matrix appears unaffected by *atf3* deficiency. Transmission electron microscopy revealed presence of the peritrophic matrix (PM) (A-B) and no obvious changes in the microvilli (MV) (A) in the midgut of control *yw* (top row) and *atf3<sup>76</sup>* (bottom row) third-instar larvae. Note that the PM (B) of *atf3* mutants appears less electron-dense with irregular edges compared to *yw* control. Scale bars are 2 μm in (A), 0.1 μm in (B).

## SUPPLEMENTAL MATERIALS AND METHODS

**Table S1** Primer sets for quantitative RT-PCR

| Primer name     | Sequence                        |
|-----------------|---------------------------------|
| atf3 iQ For     | TGG TGG ACA TGC TGA AAT CGC A   |
| atf3 iQ Rev     | ATG CTG CTG GTC AAT CAC GTT G   |
| atf3 5' iQ For  | GCT AAT TGC CAT GAC CAA TCC GCT |
| atf3 5' iQ Rev  | TGA TCC GGA GCA ACT GGA ATG ACT |
| rp49 For        | TCC TAC CAG CTT CAA GAT GAC C   |
| rp49 Rev        | CAC GTT GTG CAC CAG GAA CT      |
| attA iQ For     | TAC CGA GGC ACT TCC CAC AAC A   |
| attA iQ Rev     | AAA GAG GCA CCA TGA CCA GCA T   |
| attD iQ For     | TAA GGG TCG GTG ATG ATC TTG C   |
| attD iQ Rev     | GAA ATG CAG TGG CAT TCA GAG C   |
| dro2 iQ For     | ATT GTT GTC CTG GCC GCC AAT A   |
| dro2 iQ Rev     | CAA ATA CGT CGG CAC ATC TCG T   |
| drs iQ For      | AAG TAC TTG TTC GCC CTC TTC GCT |
| drs iQ Rev      | ATC CTT CGC ACC AGC ACT TCA GA  |
| rel iQ For      | AGC TAC AGG AAC TGC ATC AGG A   |
| rel iQ Rev      | GTT TGT GCC GAC TTG CGG TTA T   |
| CG5550 iQ For   | CTT TCA GCA CCT TCG ATA GGG A   |
| CG5550 iQ Rev   | AAC GAT TCC AGA GCC AAA CAG C   |
| CG32302 iQ For  | ATG ATG AAG TGC CAC GAG GGA T   |
| CG32302 iQ Rev  | ACG CAC TTG CAG TAC TCG ATC T   |
| Lip3 iQ For     | CGC CAA CGA GAT CTT CCT GAT T   |
| Lip3 iQ Rev     | GGA GAG CGG TGT AGT CGA ATT T   |
| PGRP-SC1 iQ For | CAA GCG ATC GTC AAC TAT TAC AGC |
| PGRP-SC1 iQ Rev | GAG ATC ATG TTC GGC TCC AGG G   |
| CG15829 iQ For  | TCG TCG AGA AGG CCA AGA ACT TCA |
| CG15829 iQ Rev  | TCG ATG TAG TAG GCC TTG GCA TCA |
| CG30502 iQ For  | GAG CCA AAG GGA AAC GTT GCA TCA |
| CG30502 iQ Rev  | ACC CAC TCA TCG TAG CAA TCC GTT |
| dFOXO iQ For    | ACG AGT TGG ACA GTA CAA AGG CCA |
| dFOXO iQ Rev    | TGA GTT CTT CTT GGC TGC ATT CGC |
| thor iQ For     | CAT GAT CAC CAG GAA GGT TGT C   |
| thor iQ Rev     | CCC GCT CGT AGA TAA GTT TGG T   |
| CG6271 iQ For   | TTT GGC AAT CTT TGC TCT AGC CGC |
| CG6271 iQ Rev   | ATC CAT GTC CAC CCA CTC AAA GGA |
| LysBCDE iQ For  | ATG AAG GCT TTC ATC GTT CTG GT  |
| LysBCDE iQ Rev  | ACT CCG GTG CGG TAG GAG GA      |
| PEPCK iQ For    | GAG CAC ATG TTG ATT CTG GGC A   |
| PEPCK iQ Rev    | CCT GCG AGT CAA ACT TCA TCC A   |
| CG7248 iQ For   | TGG AAA GGT GTA TGG CTC CTT GGT |
| CG7248 iQ Rev   | ATT CGG TGA AGG CTT CTC TGT GGT |
| CG6996 iQ For   | AAT GGA GAG TTC TCG CTG GAG CAT |
| CG6996 iQ Rev   | TTG GCC AGC TGA ATG GTG GAA TTG |
| 16S L.s. Rev    | CAA TAC CTG AAC AGT TAC TCT CA  |
| 16S L.s. For    | GAA AGA TGG CTT CGG CTA TCA     |
| 16S A.s. Rev    | TAC CGT CAT CAT CGT CCC CG      |
| 16S A.s. For    | AGG GTC AAA GGC GCA AGT C       |



### **Primer set for homologous recombination of *atf3::egfp* fusion gene**

*atf3::egfp* For:

TCGACCTGGACTCAGCCACTGCCTTCATGAACAACGGCAGTTGCCTGGCGAGCTCAG  
*GAGGTAGCGG*

*atf3::egfp* Rev:

GGAAGCAGCAGGTCGCGGTCTCGATCCCGCTCCCTGTCCGGCGCCCTTCCGGCAGAT  
*CGTCAGTCAG*

Sequences matching the pR6KGFP plasmid are indicated in italics.

### **Starvation assay (adults)**

Flies within 18 h after eclosion were placed to vials with fresh food and mated. After 48 h males and females were separated and transferred in batches of 40 individuals into vials (at least three vials per genotype and sex) containing water-soaked filter paper. Numbers of dead flies were counted at regular time intervals.

### **Transmission electron microscopy (TEM)**

Third-instar larvae were dissected in PBS and immediately fixed in 2.5% glutaraldehyde, 0.2 M phosphate buffer (pH 7.4), for at least 4 h at room temperature. Larval guts were dissected, embedded in 2% agarose, postfixed with 2% OsO<sub>4</sub> in 0.1 M phosphate buffer for 2 h at room temperature, dehydrated through ascending series of acetone concentrations, and embedded in Epon 812. Ultra-thin sections (80-90 nm) were sliced using a Leica ultramicrotome, contrasted with uranyl acetate and lead citrate and observed with JEOL 1011 electron microscope.

## SUPPLEMENTAL REFERENCES

**Buchon N, Broderick NA, Poidevin M, Pradervand S, Lemaitre B.** 2009. *Drosophila* intestinal response to bacterial infection: activation of host defense and stem cell proliferation. *Cell Host Microbe* **5**:200–211.

**Li H-M, Sun L, Mittapalli O, Muir WM, Xie J, Wu J, Schemerhorn BJ, Sun W, Pittendrigh BR, Murdock LL.** 2009. Transcriptional signatures in response to wheat germ agglutinin and starvation in *Drosophila melanogaster* larval midgut. *Insect Mol. Biol.* **18**:21–31.

**Palanker L, Tennessen JM, Lam G, Thummel CS.** 2009. *Drosophila* HNF4 regulates lipid mobilization and  $\beta$ -oxidation. *Cell Metab.* **9**:228–239.

**Zinke I, Schütz CS, Katzenberger JD, Bauer M, Pankratz MJ.** 2002. Nutrient control of gene expression in *Drosophila*: microarray analysis of starvation and sugar-dependent response. *EMBO J.* **21**:6162–6173.
